# Supplementary material for: Hepatic IFNL4 Gene Activation in Hepatocellular Carcinoma Patients with Regard to Etiology
Source: MDPI journal article supplement (doi:10.3390/ijms22157803), 2021-07-21
Supplement: s1 [file s1]

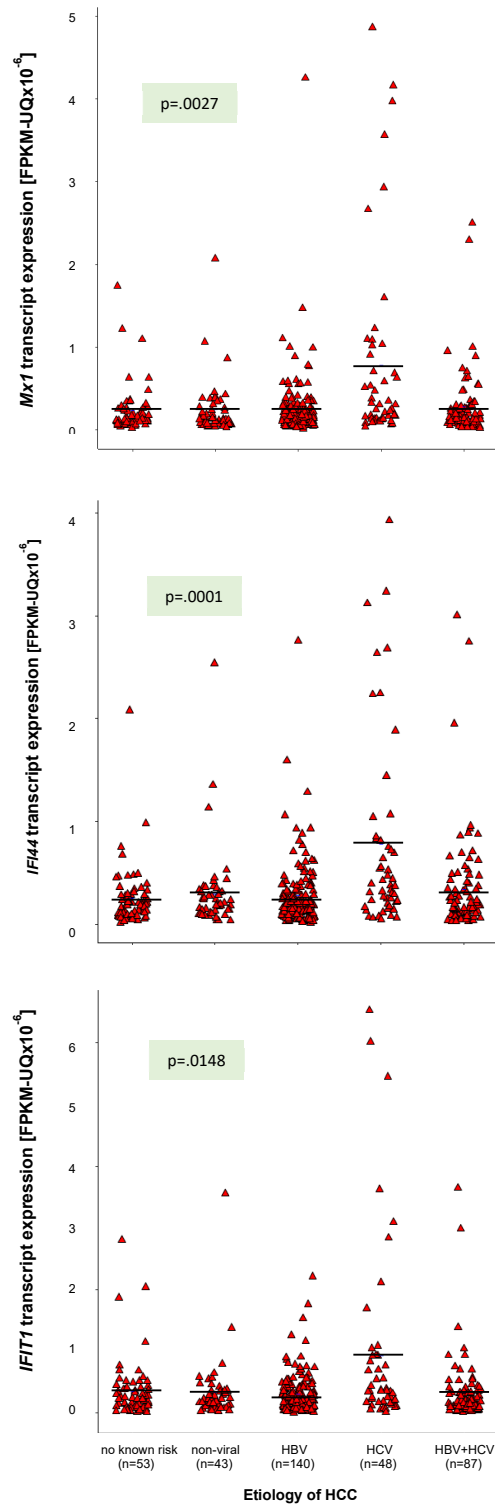

Figure S1: Interferon-stimulated gene (ISG) transcript expression in hepatocellular carcinoma (HCC) tissue samples with regard to etiology. The amount of *Mx1*, *IFI44* and *IFIT1* transcripts from a total of 371 TCGA human tissue specimens was analyzed with regard to etiology. Patients with hepatitis C virus (HCV) infection as a risk factor for development of HCC revealed 2-3-fold higher ISG expression levels than the other groups. Mean values and p-values (Kruskal-Wallis test) are indicated.
